# Supplementary material for: Physical properties and crystallization behavior of ethylene-vinyl acetate rubber/polyamide/graphene oxide thermoplastic elastomer nanocomposites
Source: Royal Society of Chemistry journal article supplement (doi:10.1039/c3ra43686a), 2013-01-01
Supplement: c3ra43686a.pdf [file c3ra43686a.pdf]

## Supplementary Information

# Physical Properties and Crystallization Behavior of Ethylene-Vinyl Acetate Rubber/Polyamide/Graphene Oxide Thermoplastic Elastomer Nanocomposites

Wenjing Wu<sup>a</sup>, Chaoying Wan<sup>b</sup>, Shifeng Wang<sup>a</sup>, Yong Zhang<sup>a,\*</sup>

<sup>a</sup> State Key Laboratory of Metal Matrix Composites, School of Chemistry and Chemical Engineering, Shanghai Jiao Tong University, Shanghai 200240, China;

<sup>b</sup> Warwick Manufacturing Group, University of Warwick, UK, CV4 7AL

Correspondence to: Yong Zhang (E-mail: yong\_zhang@sjtu.edu.cn)

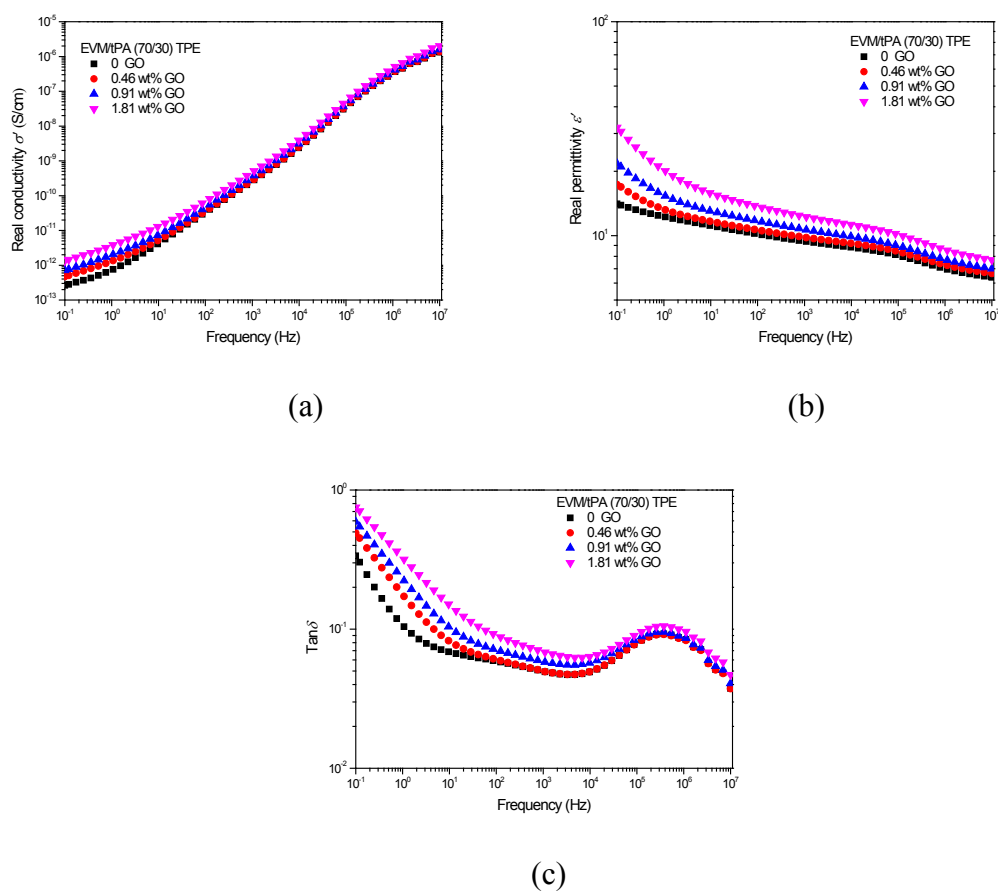

Fig. S1. Dielectric parameters of EVM/tPA/GO composites with various GO contents as a function of frequency at room temperature: (a) Real conductivity, (b) Real permittivity,

and (c) Dielectric loss factor.
